# Supplementary material
Source: PubMed Central journal article supplement (PMC5983395)
Supplement: 10.1194_M081463_jlr.M081463-1.pdf [file 10.1194_M081463_jlr.M081463-1.pdf]

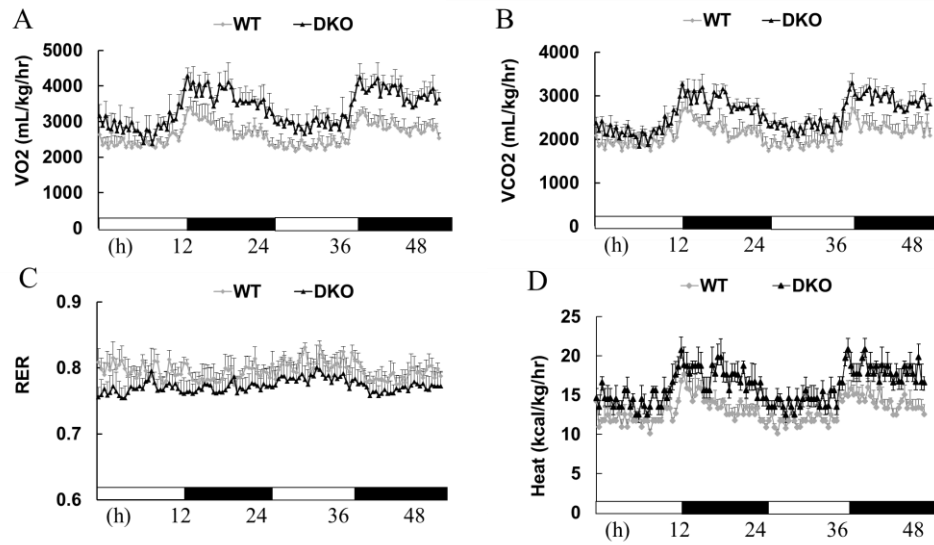

**Supplemental Figure S1. Adipocyte-specific deletion of Lkb1 and mTOR does not affect systemic energy expenditure.** Oxygen consumption (VO<sub>2</sub>, A), carbon dioxide production (VCO<sub>2</sub>, B), RER (C) and heat production (D) were measured by using indirect calorimetry system (n=5).

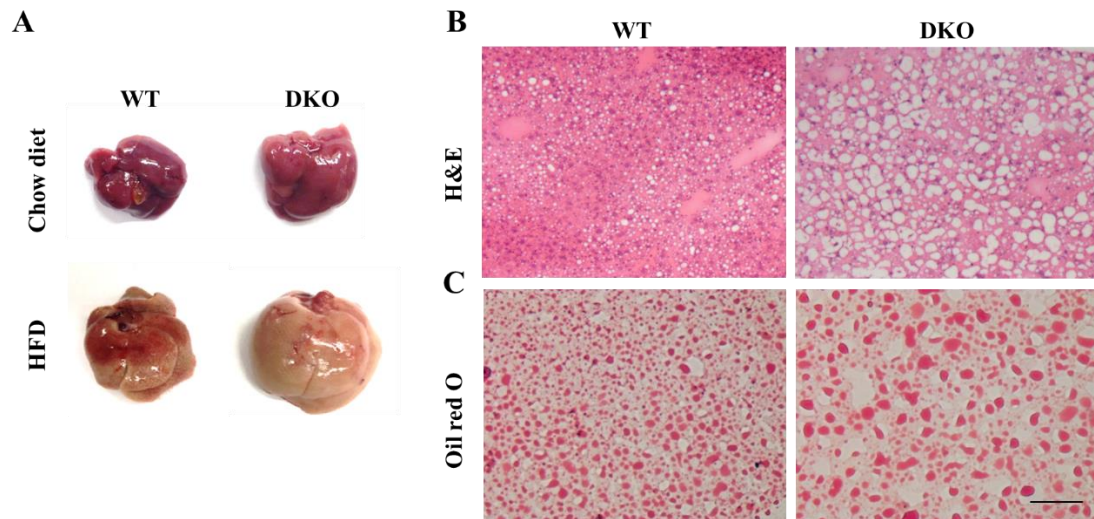

**Supplemental Figure S2. Adipocyte-specific deletion of Lkb1 and mTOR causes fatty liver.** (A) Representative images of liver after chow diet or high-fat diet (HFD) feeding. (B, C) HE (B) and Oil red O staining (C) of liver sections from WT and DKO mice after HFD-feeding. Scale bars: 100  $\mu$ m.

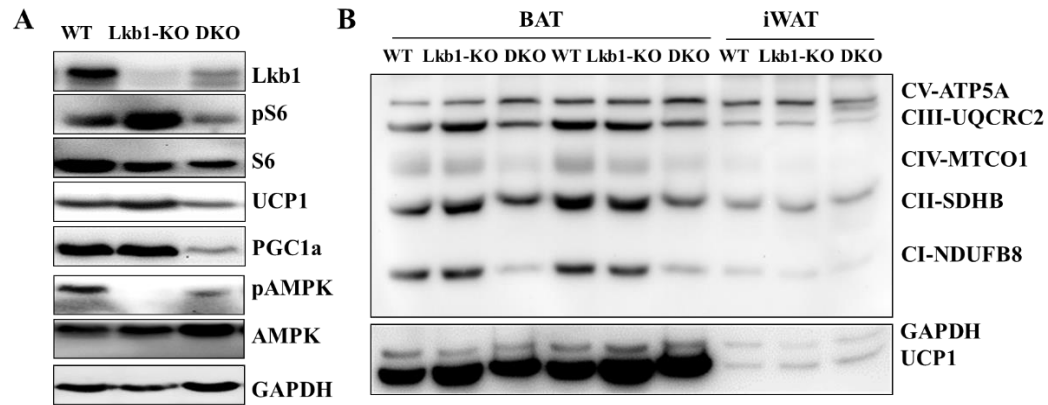

**Supplemental Figure S3. Double knockout of Lkb1 and mTOR decreased the protein levels of UCP1, PGC1 $\alpha$  and mitochondrial related proteins in BAT. (A)**

The protein levels of Lkb1, pS6, S6, UCP1 and PGC1 $\alpha$ , pAMPK, AMPK in BAT from WT, Lkb1-KO and DKO mice. (B) The levels of mitochondrial proteins in BAT and iWAT from different mice.

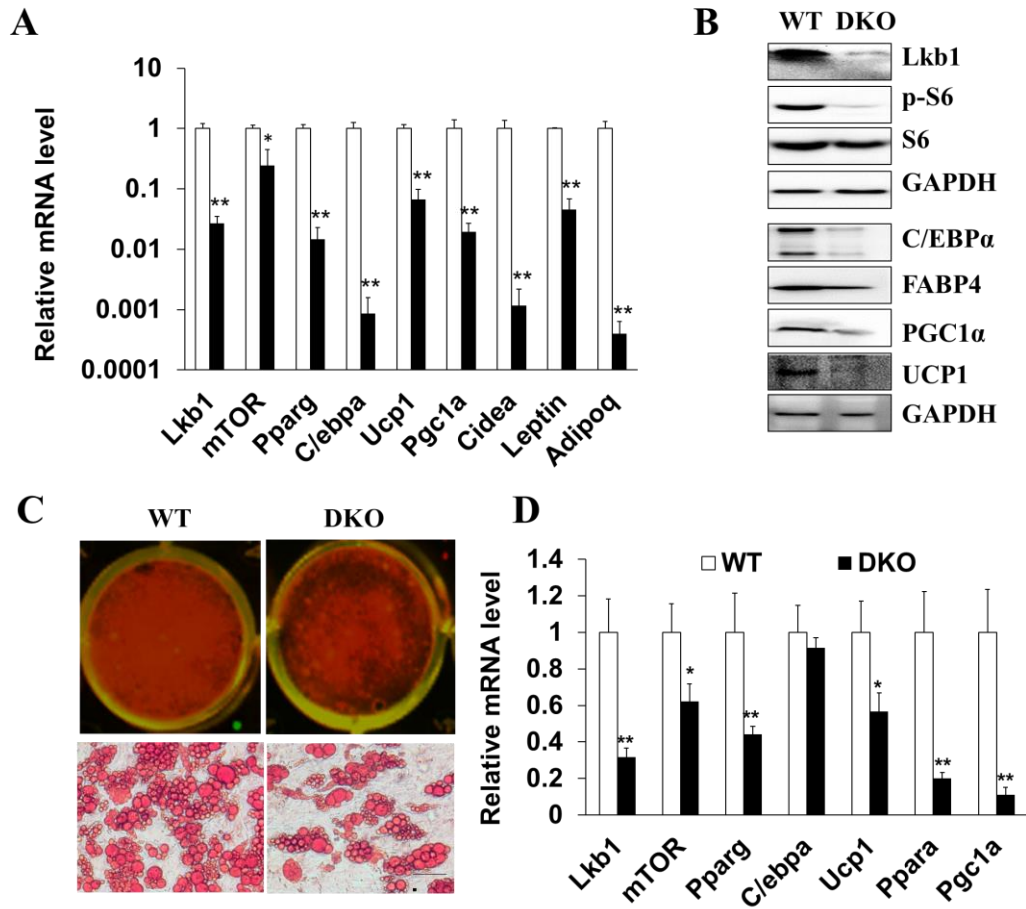

**Supplemental Figure S4. Lkb1 and mTOR ablation decreases the expression of adipogenesis and mitochondrial function related genes in iWAT and cultured iWAT adipocytes.** (A, B) mRNA (A) and protein (B) levels of adipogenesis and mitochondrial function related genes in iWAT from WT and DKO mice after 10-week of high-fat diet feeding (n=5). (C) Oil red O staining of cultured WT and DKO iWAT adipocytes. (D) mRNA levels of adipogenesis and mitochondrial function related genes in differentiated WT and KO iWAT adipocytes (n=3). Error bars represent SEM. \*  $p < 0.05$ , \*\*  $p < 0.01$ .
